# Supplementary material for: Primary Health Care System Strengthening Project in Sri Lanka: Status and Challenges with Human Resources, Information Systems, Drugs and Laboratory Services
Source: MDPI journal article supplement (doi:10.3390/healthcare10112251), 2022-11-10
Supplement: s1 [file s1]

**Annex-S1:** Standard essential drug list to be available in PMCI

| <b>Drug</b>                                                                                       |
|---------------------------------------------------------------------------------------------------|
| Adrenaline tartrate 0.1% injection 1ml Ampoule                                                    |
| Aspirin Tablet 150mg                                                                              |
| Atenolol Tablet 50mg                                                                              |
| Atorvastatin tablet 10mg                                                                          |
| Beclomethasone dipropionate                                                                       |
| Aerosol inhaler 50mcg metered dose                                                                |
| <b>200 dose unit MDI dry powder capsule for breath induced device</b><br>100mcg DPI<br>200mcg DPI |
| <b>Chlorpheniramine malate</b><br>Injection 10mg in 1ml Ampoule<br>tablet 4mg                     |
| Enalapril malate tab 5mg                                                                          |
| <b>Frusemide</b><br>injection 20mg in 2ml Ampoule<br>tablet 40mg                                  |
| Glyceryl trinitrate tablet 0.5mg sublingual                                                       |
| Hydrochlorothiazide tablet 25mg                                                                   |
| Hydrocortisone hemi succinate injection 100mg vial                                                |
| Metformin tablet 500mg                                                                            |
| Nifedipine slow release tablet 20mg                                                               |
| <b>Salbutamol</b><br>Respiratory solution 0.5% in 10ml bottle<br>Tablet 2mg & 4mg                 |
| Theophylline slow released tablet 125mg                                                           |

**Annex-S2:** List of laboratory services under basic laboratory package of PSSP

| <b>Category</b>       | <b>Investigations</b>                                                                                                                                                                                                                                                                                                                                                                        |
|-----------------------|----------------------------------------------------------------------------------------------------------------------------------------------------------------------------------------------------------------------------------------------------------------------------------------------------------------------------------------------------------------------------------------------|
| <b>Hematology</b>     | Full Blood Count<br>Blood Grouping and Rh<br>ESR<br>Malarial Parasite<br>Blood Picture                                                                                                                                                                                                                                                                                                       |
| <b>Biochemistry</b>   | Lipid Profile<br>Total Cholesterol<br>Serum Creatinine<br>Blood Glucose<br>HbA1C<br>Oral Glucose Tolerance Test<br>Troponins (I/T)<br>ALT/AST CRP<br>Urine for bilirubin<br>Urine for glucose<br>Urine for ketone bodies<br>Urine for proteins<br>Urine for reducing substances<br>Urine for urobilinogen<br>Urine for $\beta$ - HCG (qualitative)<br>Urine Microalbumin to Creatinine ratio |
| <b>Histopathology</b> | PAP-Smear                                                                                                                                                                                                                                                                                                                                                                                    |
| <b>Microscopy</b>     | Urine/Stool Direct Microscopy<br>AFB stain for TB<br>Forward specimens for culture<br>Dengue Antigen and Antibody tests<br>VDRL/HIV (sample to be sent district STD Clinics)                                                                                                                                                                                                                 |

### Annex-S3: Facility assessment Checklist

#### Instructions for filling the form:

1. Please enter name of the person completing the questionnaire in uppercase letters
2. Always type/write inside the boxes or lines provided.
3. In case of numerical responses, always enter only one digit in each box

#### Guide of the Interview:

1. Good day! My name is \_\_\_\_\_.
2. We are here on behalf of The International Union Against Tuberculosis and Lung Disease and Foundation for Health Promotion for conducting a survey of health facilities to assist the government in knowing more about health services in Sri Lanka.
3. Now I will read a statement explaining the study.
4. Your facility was selected to participate in this study. We will be asking you questions about various health services and empanelment of this PMCI under Primary Healthcare System Strengthening Project (PSSP) of Sri Lanka. Information about your facility may be used by the MOH, organizations supporting services in your facility, for planning service improvement or for conducting further studies of health services.
5. Neither your name nor that of any other health worker respondents participating in this study will be included in the dataset or in any report; however, there is a small chance that any of these respondents may be identified later. Still, we are asking for your help to ensure that the information we collect is accurate.
6. You may refuse to answer any question or choose to stop the interview at any time. However, we hope you will answer the questions, which will benefit the services you provide and the country.
7. If there are questions for which someone else is the most appropriate person to provide the information, we would appreciate if you introduce us to that person to help us collect that information.
8. At this point, do you have any questions about the study? Do I have your agreement to proceed?

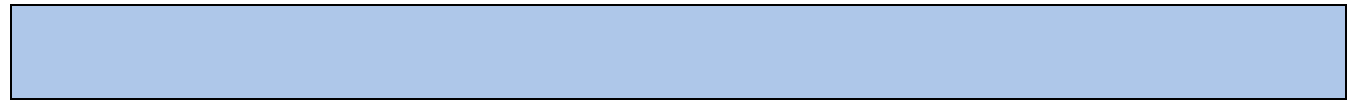

Thank you for taking your time in completing the questionnaire/ checklist

### A. General Information

|     |                                                            |                                                                                                                                                                                              |
|-----|------------------------------------------------------------|----------------------------------------------------------------------------------------------------------------------------------------------------------------------------------------------|
| A1  | Name of the person completing the questionnaire (Assessor) | <hr/>                                                                                                                                                                                        |
| A2  | Date of Assessment:                                        | DD <input type="text"/> <input type="text"/> MM <input type="text"/> <input type="text"/> YYYY <input type="text"/> <input type="text"/> <input type="text"/> <input type="text"/>           |
| A3  | Name of the respondents                                    | <hr/>                                                                                                                                                                                        |
| A4  | Designation of the respondent/s                            | <hr/>                                                                                                                                                                                        |
| A5  | Facility code:                                             | <input type="text"/> <input type="text"/> <input type="text"/> <input type="text"/> <input type="text"/>                                                                                     |
| A6  | Name of the facility                                       | <hr/>                                                                                                                                                                                        |
| A7  | Location of the facility                                   | <hr/>                                                                                                                                                                                        |
| A8  | District                                                   | <hr/>                                                                                                                                                                                        |
| A9  | Province                                                   | <hr/>                                                                                                                                                                                        |
| A10 | Type of PMCI (Please tick ✓)                               | 1. Divisional Hospital-A <input type="checkbox"/> 4. PMCU <input type="checkbox"/><br>3. Divisional Hospital-B <input type="checkbox"/><br>4. Divisional Hospital-C <input type="checkbox"/> |
| A11 | Area (Please tick ✓)                                       | 1. Urban <input type="checkbox"/> 2. Rural <input type="checkbox"/>                                                                                                                          |
| A12 | Service hours                                              | 1. 24x7 <input type="checkbox"/><br>2. Forenoon only <input type="checkbox"/><br>3. Forenoon and afternoon <input type="checkbox"/>                                                          |

|     |                  |
|-----|------------------|
| A13 | Remarks (if any) |
|-----|------------------|

### B. Hospital Information Management System

|      |                                                                                    |                                                                                                                                                      |                                                                         |
|------|------------------------------------------------------------------------------------|------------------------------------------------------------------------------------------------------------------------------------------------------|-------------------------------------------------------------------------|
| B1   | Availability of Computer (at least 1)?                                             | 1. Yes <input type="checkbox"/>                                                                                                                      | 0. No <input type="checkbox"/>                                          |
| B1a  | Number of computers/laptops available for PMCI?                                    | 1. Desktop-<br>2. Laptops-                                                                                                                           |                                                                         |
| B2   | Availability of internet                                                           | 1. Yes <input type="checkbox"/>                                                                                                                      | 0. No <input type="checkbox"/>                                          |
| B2a  | If available, is it provided by the government or you use your private connection? | 1. Government <input type="checkbox"/>                                                                                                               | 2. Private <input type="checkbox"/><br>3. Both <input type="checkbox"/> |
| B3   | Availability of functional electronic HIMS?? (Registration-PMCI/HLC)               | 1. Yes <input type="checkbox"/>                                                                                                                      | 0. No <input type="checkbox"/>                                          |
| B4   | Availability of trained manpower to handle the HIMS?                               | 1. Yes <input type="checkbox"/>                                                                                                                      | 0. No <input type="checkbox"/>                                          |
| B4a  | Number of people trained to handle the HIMS? (document the designation)            |                                                                                                                                                      |                                                                         |
| B5   | Whether networking of local data server with national data center (cloud) is done  | 1. Yes, currently functional <input type="checkbox"/><br>2. Yes, currently non functional <input type="checkbox"/><br>0. No <input type="checkbox"/> |                                                                         |
| B6   | Is electronic database of individuals (with PHN) empaneled is available?           | 1. Yes <input type="checkbox"/>                                                                                                                      | 0. No <input type="checkbox"/>                                          |
| B6.i | If available, total people listed                                                  |                                                                                                                                                      |                                                                         |

|        |                                                                                                           |                                                                |
|--------|-----------------------------------------------------------------------------------------------------------|----------------------------------------------------------------|
| B6.ii  | If not available, reason                                                                                  |                                                                |
| B7     | Whether PHR printed in a hard paper board (printed booklet) available?                                    | 1. Yes <input type="checkbox"/> 0. No <input type="checkbox"/> |
| B7.i   | Number of individuals registered with PHN in the facility                                                 |                                                                |
| B7.ii  | Number of those registered who have received printed PHR booklet?                                         |                                                                |
| B7.iii | Number of those registered who have PHR but not printed booklet (may be a different book or case record?) |                                                                |
| B7.i   | If printed PHR booklet not issued or partially issued, reason                                             |                                                                |
| B8     | Whether electronic PHR available?                                                                         | 1. Yes <input type="checkbox"/> 0. No <input type="checkbox"/> |
| B9     | Whether PHR is updated during each visit patient makes?                                                   | 1. Yes <input type="checkbox"/> 0. No <input type="checkbox"/> |
| B9.i   | If no, reason                                                                                             |                                                                |
| B10    | Whether the details of referral/ back referral are updated in PHR?                                        | 1. Yes <input type="checkbox"/> 0. No <input type="checkbox"/> |
| B11    | Remarks (if any)                                                                                          |                                                                |

**C. Trained Human Resource in PMCI including associated HLC**

|     | Designation                                                                                         | Number   |                        |                                                          |                                                        |
|-----|-----------------------------------------------------------------------------------------------------|----------|------------------------|----------------------------------------------------------|--------------------------------------------------------|
|     |                                                                                                     | Approved | Existing/<br>Available | Trained in<br>PMCI<br>empanelment<br>(1 day<br>training) | Trained on<br>NCD<br>guidelines<br>(1 day<br>training) |
| D1  | Medical Officers                                                                                    |          |                        |                                                          |                                                        |
| D2  | Nursing Officer<br>(?PHNO)                                                                          |          |                        |                                                          |                                                        |
|     | Public Health Midwives                                                                              |          |                        |                                                          |                                                        |
|     | Dispenser                                                                                           |          |                        |                                                          |                                                        |
| D3  | Pharmacist                                                                                          |          |                        |                                                          |                                                        |
| D4  | Management Assistant                                                                                |          |                        |                                                          |                                                        |
| D5  | Health Promotion<br>Officers                                                                        |          |                        |                                                          |                                                        |
| D6  | Counsellors                                                                                         |          |                        |                                                          |                                                        |
| D7  | Dieticians                                                                                          |          |                        |                                                          |                                                        |
| D8  | Instructors in physical<br>education                                                                |          |                        |                                                          |                                                        |
| D9  | Nutritionists                                                                                       |          |                        |                                                          |                                                        |
| D10 | Dental surgeon                                                                                      |          |                        |                                                          |                                                        |
| D11 | Attendants                                                                                          |          |                        |                                                          |                                                        |
| D12 | Saukya Karya Sahayaka                                                                               |          |                        |                                                          |                                                        |
| D13 | Other healthcare staff                                                                              |          |                        |                                                          |                                                        |
| D14 | Public Health<br>Laboratory Technician                                                              |          |                        |                                                          |                                                        |
|     |                                                                                                     |          |                        |                                                          |                                                        |
|     |                                                                                                     |          |                        |                                                          |                                                        |
| D13 | Remarks (If any)- (Especially add details here on if the existing is '0', how the work is managed?) |          |                        |                                                          |                                                        |



### D. Equipment

| Sl.No   | Equipment                    | Number     |           |                               |                                                      |                                           |
|---------|------------------------------|------------|-----------|-------------------------------|------------------------------------------------------|-------------------------------------------|
|         |                              | Sanctioned | Available | Functional/<br>Calibrated (C) | Approximate number of<br>days not functional in 2020 | Number of test strips<br>consumed in 2020 |
| E1.i    | Glucometer                   |            |           |                               |                                                      |                                           |
| E1.ii   | Cholesterol meter            |            |           |                               |                                                      |                                           |
| E1.iii  | BP apparatus                 |            |           | C-                            |                                                      |                                           |
| E1.iv   | Stethoscopes                 |            |           |                               |                                                      |                                           |
| E1.v    | Weight scale                 |            |           | C-                            |                                                      |                                           |
| E1.vi   | Height measuring rod / Board |            |           |                               |                                                      |                                           |
| E1.vii  | Weighing scales for infants  |            |           | C-                            |                                                      |                                           |
| E1.ix   | Measuring tape               |            |           |                               |                                                      |                                           |
| E1.x    | Ophthalmoscope               |            |           |                               |                                                      |                                           |
| E1.xi   | Snellen chart                |            |           |                               |                                                      |                                           |
| E1.xii  | Tuning Fork                  |            |           |                               |                                                      |                                           |
| E1.xiii | Examination bed              |            |           |                               |                                                      |                                           |
| E1.xiv  | Tongue depressors            |            |           |                               |                                                      |                                           |

|          |                        |  |  |  |  |
|----------|------------------------|--|--|--|--|
| E1.xv    | Torch                  |  |  |  |  |
| E1.xvi   | Tendon hammer          |  |  |  |  |
| E1.xvii  | Thermometers (digital) |  |  |  |  |
| E1.xviii | Nebulizer              |  |  |  |  |

### E. Laboratory Services through PMCI

| Sl.No | Laboratory Tests                  | Available (Y/N) | If available: PMCI / Public-Cluster / Private-Cluster / Others | If not PMCI, sample collection and transport available (Y/N) | Number of tests done in 2020 | Approximate number of days the investigation was not available in 2020 |
|-------|-----------------------------------|-----------------|----------------------------------------------------------------|--------------------------------------------------------------|------------------------------|------------------------------------------------------------------------|
| F1    | Blood Glucose                     |                 |                                                                |                                                              |                              |                                                                        |
| F2    | HbA1C                             |                 |                                                                |                                                              |                              |                                                                        |
| F3    | Total Cholesterol                 |                 |                                                                |                                                              |                              |                                                                        |
| F4    | Lipid Profile                     |                 |                                                                |                                                              |                              |                                                                        |
| F5    | Serum Creatinine                  |                 |                                                                |                                                              |                              |                                                                        |
| F6    | Urine for glucose                 |                 |                                                                |                                                              |                              |                                                                        |
| F7    | Urine for ketone bodies           |                 |                                                                |                                                              |                              |                                                                        |
| F8    | Urine Albumin to Creatinine ratio |                 |                                                                |                                                              |                              |                                                                        |
| F9    | Oral Glucose Tolerance Test       |                 |                                                                |                                                              |                              |                                                                        |
| F10   | PAP-Smear                         |                 |                                                                |                                                              |                              |                                                                        |
| F11   | ALT/AST                           |                 |                                                                |                                                              |                              |                                                                        |
| F12   | Complete Blood Count              |                 |                                                                |                                                              |                              |                                                                        |
| F13   | AFB stain for TB                  |                 |                                                                |                                                              |                              |                                                                        |
| F14   | HIV                               |                 |                                                                |                                                              |                              |                                                                        |
| F15   | Blood Grouping and Rh             |                 |                                                                |                                                              |                              |                                                                        |
| F16   | Dengue Antigen or Antibody tests  |                 |                                                                |                                                              |                              |                                                                        |
| F17   | Malarial Parasite                 |                 |                                                                |                                                              |                              |                                                                        |

|     |                  |
|-----|------------------|
| F18 | Remarks (if any) |
|-----|------------------|

## F. Essential NCD Drugs and Supply Chain

[illegible]



|      |                                                                                |                                                                                                                                                           |
|------|--------------------------------------------------------------------------------|-----------------------------------------------------------------------------------------------------------------------------------------------------------|
| G2   | Drug storage facility adequate?                                                | 1. Yes <input type="checkbox"/> 0. No <input type="checkbox"/>                                                                                            |
| G3   | NCD drugs are dispensed in blister packs?                                      | 1. Yes, all drugs <input type="checkbox"/> 0. No <input type="checkbox"/><br>2. Yes, some drugs (partial) <input type="checkbox"/>                        |
| G3.i | If not available or partial, reason                                            |                                                                                                                                                           |
| G4   | NCD drugs are dispensed for one month or more than one month?                  | 1. Yes <input type="checkbox"/> 0. No <input type="checkbox"/>                                                                                            |
| G4.i | If not dispensed for a month or dispensed for more than one month, reason      |                                                                                                                                                           |
| G5   | Availability of trained manpower to handle the drug supply chain               | 1. Yes <input type="checkbox"/> 0. No <input type="checkbox"/>                                                                                            |
|      | If Pharmacist and/or dispenser are not available, who is dispensing medicines? |                                                                                                                                                           |
| G6   | Whether online drug indenting system is available?                             | 1. Yes, available and Functional <input type="checkbox"/> 0. No <input type="checkbox"/><br>2. Yes, available but not functional <input type="checkbox"/> |
| G7   | Remarks (if any)                                                               |                                                                                                                                                           |

|  |  |
|--|--|
|  |  |
|--|--|



### H. Friends of Facility and Grievance Redressal

|        |                                                                                             |                                                                |
|--------|---------------------------------------------------------------------------------------------|----------------------------------------------------------------|
| H1     | Is “Friends of Facility” committee established in PMCI?                                     | 1. Yes <input type="checkbox"/> 0. No <input type="checkbox"/> |
| H2     | Number of Members in Friends of Facility committee                                          |                                                                |
| H3     | Whether ‘Friends of Facility’ has at least one member from each GN                          | 1. Yes <input type="checkbox"/> 0. No <input type="checkbox"/> |
| H4     | Number of ‘Friends of Facility’ meetings conducted in 2020                                  |                                                                |
| H5     | Number of meetings for which minutes have been documented in 2020                           |                                                                |
| H6     | Number of patient grievances discussed/addressed during Friends of Facility meeting in 2020 |                                                                |
| H7     | Date of last Friends of Facility meeting                                                    |                                                                |
| H8     | Number of members who attended the last meeting?                                            |                                                                |
| H9     | Is there a box or mechanism for dropping the patient grievances?                            |                                                                |
| H10    | If available, how many grievances were submitted during 2020                                |                                                                |
| H10.i  | Of those submitted, how many were discussed in Friends of Facility meeting                  |                                                                |
| H10.ii | Of those submitted, how many have been addressed                                            |                                                                |
| H11    | Remarks (if any)                                                                            |                                                                |

## H. Infrastructure

|       |                                                    |                                                                                                                                                                       |                                    |
|-------|----------------------------------------------------|-----------------------------------------------------------------------------------------------------------------------------------------------------------------------|------------------------------------|
| I1    | Drinking water                                     | 1. Present <input type="checkbox"/>                                                                                                                                   | 0. Absent <input type="checkbox"/> |
| I2    | Electricity                                        | 1. Present <input type="checkbox"/>                                                                                                                                   | 0. Absent <input type="checkbox"/> |
| I2i   | Electricity backup                                 | 1. Present <input type="checkbox"/>                                                                                                                                   | 0. Absent <input type="checkbox"/> |
| I3    | Waiting area with reception counter                | 1. Present <input type="checkbox"/>                                                                                                                                   | 0. Absent <input type="checkbox"/> |
| I3.i  | Number of seats in waiting area                    |                                                                                                                                                                       |                                    |
| I3.ii | Average number of OPD attendance in last one month |                                                                                                                                                                       |                                    |
| I4    | Bill board displayed (outside)                     | 1. Present, in all three language <input type="checkbox"/><br>2. Present but not in all three <input type="checkbox"/> language<br>0. Absent <input type="checkbox"/> |                                    |
| I5    | Map of empaneled area displayed                    | 1. Present <input type="checkbox"/>                                                                                                                                   | 0. Absent <input type="checkbox"/> |
| I6    | OPD label                                          | 1. Present, in all three language <input type="checkbox"/><br>2. Present but not in all three <input type="checkbox"/> language<br>0. Absent <input type="checkbox"/> |                                    |
| I7    | Signboards                                         | 1. Present <input type="checkbox"/>                                                                                                                                   | 0. Absent <input type="checkbox"/> |
| I8    | Notice board with services available               | 1. Present, in all three language <input type="checkbox"/><br>2. Present but not in all three <input type="checkbox"/> language<br>0. Absent <input type="checkbox"/> |                                    |
| I9    | Notice board with empanelment status               | 1. Present, in all three language <input type="checkbox"/><br>2. Present but not in all three <input type="checkbox"/> language<br>0. Absent <input type="checkbox"/> |                                    |
| I10   | General office (room 1)                            | 1. Present <input type="checkbox"/>                                                                                                                                   | 0. Absent <input type="checkbox"/> |
| I11   | Consultation room 1                                | 1. Present <input type="checkbox"/>                                                                                                                                   | 0. Absent <input type="checkbox"/> |
| I12   | Consultation room 2                                | 1. Present <input type="checkbox"/>                                                                                                                                   | 0. Absent <input type="checkbox"/> |
| I13   | Consultation room 3                                | 1. Present <input type="checkbox"/>                                                                                                                                   | 0. Absent <input type="checkbox"/> |

|        |                                                                     |                                     |                                    |
|--------|---------------------------------------------------------------------|-------------------------------------|------------------------------------|
| I14    | Dispensary / dispenser room                                         | 1. Present <input type="checkbox"/> | 0. Absent <input type="checkbox"/> |
| I15    | Drug store/ supplementation store (with air conditioner)            | 1. Present <input type="checkbox"/> | 0. Absent <input type="checkbox"/> |
| I16    | Laboratory room (with sink)                                         | 1. Present <input type="checkbox"/> | 0. Absent <input type="checkbox"/> |
| I17    | Medical officers rest room with bathroom                            | 1. Present <input type="checkbox"/> | 0. Absent <input type="checkbox"/> |
| I18    | Rest room for other staff with bathroom                             | 1. Present <input type="checkbox"/> | 0. Absent <input type="checkbox"/> |
| I19    | Minor staff room with bathroom                                      | 1. Present <input type="checkbox"/> | 0. Absent <input type="checkbox"/> |
| I20    | Overseer or matron room 1                                           | 1. Present <input type="checkbox"/> | 0. Absent <input type="checkbox"/> |
| I21    | Overseer or matron room 2                                           | 1. Present <input type="checkbox"/> | 0. Absent <input type="checkbox"/> |
| I22    | Patient toilet                                                      | 1. Present <input type="checkbox"/> | 0. Absent <input type="checkbox"/> |
| I22.1  | Number of toilets for male /number which are disability friendly    |                                     |                                    |
| I22.ii | Number of toilets for female / number which are disability friendly |                                     |                                    |
| I23    | Meeting room with pantry                                            | 1. Present <input type="checkbox"/> | 0. Absent <input type="checkbox"/> |
| I24    | General store                                                       | 1. Present <input type="checkbox"/> | 0. Absent <input type="checkbox"/> |
| I25    | Instrument room                                                     | 1. Present <input type="checkbox"/> | 0. Absent <input type="checkbox"/> |
| I26    | Health promotion room or health education room                      | 1. Present <input type="checkbox"/> | 0. Absent <input type="checkbox"/> |
| I27    | Dental room                                                         | 1. Present <input type="checkbox"/> | 0. Absent <input type="checkbox"/> |
| I28    | ETU room or space for emergency care services                       | 1. Present <input type="checkbox"/> | 0. Absent <input type="checkbox"/> |
| I29    | Dressing room                                                       | 1. Present <input type="checkbox"/> | 0. Absent <input type="checkbox"/> |
| I30    | Vaccination room/ injection room                                    | 1. Present <input type="checkbox"/> | 0. Absent <input type="checkbox"/> |
| I31    | Office space for PHMs                                               | 1. Present <input type="checkbox"/> | 0. Absent <input type="checkbox"/> |
| I32    | Office space for PHIs                                               | 1. Present <input type="checkbox"/> | 0. Absent <input type="checkbox"/> |

|     |                                                                   |                                                                                                                                                                       |                                    |
|-----|-------------------------------------------------------------------|-----------------------------------------------------------------------------------------------------------------------------------------------------------------------|------------------------------------|
| I33 | Quarters for MO (1)                                               | 1. Present <input type="checkbox"/>                                                                                                                                   | 0. Absent <input type="checkbox"/> |
| I34 | Quarters for MO (2)                                               | 1. Present <input type="checkbox"/>                                                                                                                                   | 0. Absent <input type="checkbox"/> |
| I35 | Quarters for PHMs                                                 | 1. Present <input type="checkbox"/>                                                                                                                                   | 0. Absent <input type="checkbox"/> |
| I36 | Audiovisual equipment's for Health Education (Details if present) | 1. Present <input type="checkbox"/>                                                                                                                                   | 0. Absent <input type="checkbox"/> |
| I37 | IEC- Leaflets                                                     | 1. Present, in all three language <input type="checkbox"/><br>2. Present but not in all three <input type="checkbox"/> language<br>0. Absent <input type="checkbox"/> |                                    |
| I38 | Quarters for nurses                                               | 1. Present <input type="checkbox"/>                                                                                                                                   | 0. Absent <input type="checkbox"/> |
| I34 | Remarks (if any)                                                  |                                                                                                                                                                       |                                    |

#### Annex-S4: Interview guide for healthcare providers

Respondents: Program Manager/ Doctor / nursing staff/ laboratory technician

| AIM 1                                                                                                                                                                                                                                                         | Objective                                                                                                                          |
|---------------------------------------------------------------------------------------------------------------------------------------------------------------------------------------------------------------------------------------------------------------|------------------------------------------------------------------------------------------------------------------------------------|
| To assess if the PMCI and their services have been reorganised in line with the standards and clinical care protocol endorsed by the Ministry of Health (MOH) and explore the challenges perceived by the healthcare providers in the reorganisation process. | Explore the challenges with retention and training of health staff of PMCI as perceived by the programme managers and health staff |

|                                                                                                                 |                                                                                                                                                                                                                                                                                                     |
|-----------------------------------------------------------------------------------------------------------------|-----------------------------------------------------------------------------------------------------------------------------------------------------------------------------------------------------------------------------------------------------------------------------------------------------|
| Greetings                                                                                                       |                                                                                                                                                                                                                                                                                                     |
| Can you please give us an introduction about yourself?                                                          | Probe for his/her tenure of service over here as the treating physician/ healthcare staff/ program officer, previous experience, training, if any, in relation to on NCD management                                                                                                                 |
| What is your current role and how do you plan to deliver your responsibilities?                                 | Probe for daily routine, work plan, common issues faced                                                                                                                                                                                                                                             |
| in your opinion, whether the PMCI have adequate number of human resources as recommended in the PMCI guidelines | Probe for challenges in retaining medical officers, nursing staffs, lab technicians and other staff, frequency of staff transfer, if any, and issues in staff replacement                                                                                                                           |
| Whether you have been trained on the reorganized PMCI or PSSP project?                                          | Probe for ease of understanding in during the training, duration of training, applicability of the training in day to day practice under the PSSP project at the PMCI, challenges related to training, if any. Whether any materials was given, post training support and clarification of queries. |
| What kind of challenges you are facing while working together with other staffs at the PMCI                     | Probe for delaying of work, incomplete or inadequate training, any discussion meeting happened at the PMCI to understand regarding the PSSP project, any other challenges in PMCI functioning under the PSSP project.                                                                               |
| What kind of challenges you are facing while providing healthcare to patient the PMCI                           | Probe for delaying of work, difficulty in understating due to incomplete or inadequate training, any other challenges in PMCI functioning under the PSSP project.                                                                                                                                   |
| What kind of challenges in coordinating with GNs and apex hospitals?                                            | Probe for referral system functioning, follow-up of patients after back referral, challenges in coordination with staffs from GN and apex hospital, if any.                                                                                                                                         |

| AIM 1                                                                                                                                                                                                                                                          | Objective                                                                                                                                                                                                                                                                                                    |
|----------------------------------------------------------------------------------------------------------------------------------------------------------------------------------------------------------------------------------------------------------------|--------------------------------------------------------------------------------------------------------------------------------------------------------------------------------------------------------------------------------------------------------------------------------------------------------------|
| To assess if the PMCIs and their services have been reorganised in line with the standards and clinical care protocol endorsed by the Ministry of Health (MOH) and explore the challenges perceived by the healthcare providers in the reorganisation process. | Explore the challenges in supply chain management using MSMIS and reasons for 'urgent' or local purchases as perceived by the programme managers and health staff                                                                                                                                            |
| In your opinion how was the overall ease of operation of MSMIS?                                                                                                                                                                                                | Probe for the process of MSMIS, availability of trained manpower, a functional computer with internet connectivity, other challenges related to operating the MSMIS                                                                                                                                          |
| What kind of challenges you faced while indenting the essential drugs for NCD management                                                                                                                                                                       | Probe for availability of all essential drugs of NCD, ease of changing the requirement during every indenting, options of adding any new drug/ dosage, procedure the required essential drug is not available in the central store at the time of indenting, challenges in receiving the non-available drugs |
| What is the average lead time from the generation of indent and receiving the drugs at the PMCI                                                                                                                                                                | Probe for different lead time for different drugs or all drug will be delivered at the same time only                                                                                                                                                                                                        |
| What kind of challenges did your PMCI faced for maintaining buffer stock all essential drugs?                                                                                                                                                                  | Probe for knowledge on buffer stock, calculating and indenting for buffer stock, receiving buffer stock                                                                                                                                                                                                      |
| In your opinion in what situations or for what drugs local purchase or urgent purchase was made?                                                                                                                                                               | Probe for issues in indenting from PMCI or central store, management of fund for local purchase, what all drugs and for what duration this local purchase was made                                                                                                                                           |
| What was the inventory control system managed in the PMCI                                                                                                                                                                                                      | Probe for the inventory control process followed at the hospital, the healthcare staff who is managing and the frequency of monitoring by the head of PMCI                                                                                                                                                   |
| Can you please tell how the near to expiry drugs were managed                                                                                                                                                                                                  | Probe for expired drugs and near-to expiry date drugs present in last one year, what is the mechanism for management of the same?                                                                                                                                                                            |
| What is the kind of training provided for supply chain management?                                                                                                                                                                                             | Probe for special training on MSMIS, supply chain management and inventory control, the individual who attended it from PMCI, or any other support is provided for supply chain and inventory control?                                                                                                       |

| AIM 1                                                                                                                                                                                                                                                          | Objective 5                                                                                                                                                                                                                                |
|----------------------------------------------------------------------------------------------------------------------------------------------------------------------------------------------------------------------------------------------------------------|--------------------------------------------------------------------------------------------------------------------------------------------------------------------------------------------------------------------------------------------|
| To assess if the PMCIs and their services have been reorganised in line with the standards and clinical care protocol endorsed by the Ministry of Health (MOH) and explore the challenges perceived by the healthcare providers in the reorganisation process. | Understand the mechanisms (patient referral or sample collection and transport) established for laboratory investigations and challenges associated with it, as perceived by the programme managers, health staff of PMCI and the patients |

|                                                                                                                           |                                                                                                                                                                                                                                                  |
|---------------------------------------------------------------------------------------------------------------------------|--------------------------------------------------------------------------------------------------------------------------------------------------------------------------------------------------------------------------------------------------|
| What kind of challenges were faced while providing laboratory services                                                    | Probe for the process of laboratory investigations, tests at PMCI, private facility test, patient feedback regarding the laboratory tests                                                                                                        |
| Can you please tell whether all the essential tests for NCD management is available at the PMCI                           | Probe for the process of laboratory investigations at the PMCI, challenges in sample collection, biomedical waste management, process of non-available tests at the PMCI                                                                         |
| What kind of challenges you faced in sample collection and transporting of the samples at the PMCI?                       | Probe for challenges in sample collection, transporting, vehicle, cold storage, pre-processing of the sample.                                                                                                                                    |
| In your opinion, how quickly the results were obtained                                                                    | Probe for duration of waiting time after sample collection and provision of results to the patient, mechanism for sending the results back to the PMCI, process of coordination between public and private sector for providing the lab services |
| Whether the trained man power was available in the PMCI in the last one year?                                             | Probe for adequate manpower to provide lab services and skills of the laboratory technician                                                                                                                                                      |
| Whether there was any disruption of any of the lab services in last one year and can you please tell what was the reason? | Probe for reasons such as equipment related problem, consumables related, manpower related, any other etc                                                                                                                                        |
